# Supplementary material for: Solid–Liquid Equilibrium in Co-Amorphous Systems: Experiment and Prediction
Source: MDPI journal article supplement (doi:10.3390/molecules28062492), 2023-03-08
Supplement: s1 [file s1]

**Table S1.**  $T_g$  values obtained for binary systems studied.

| $x_1$ | $T_g / ^\circ\text{C}$ |                   |                   |                   |
|-------|------------------------|-------------------|-------------------|-------------------|
|       | NAP (1) – IND (2)      | NAP (1) – IBU (2) | NAP (1) – PRO (2) | IND (1) – PAR (2) |
| 0.1   | 43.2                   | -41.1             | 25.6              | 24.2              |
| 0.2   | 37.3                   | -35.9             | 24.4              | 27.5              |
| 0.3   | 31.3                   | -31.1             | 22.5              | 28.8              |
| 0.4   | 30.4                   | -25.0             | 21.4              | 31.8              |
| 0.5   | 27.0                   | -21.4             | 19.2              | 33.5              |
| 0.6   | 22.7                   | -                 | -                 | 35.0              |
| 0.7   | 19.8                   | -                 | -                 | 31.2              |
| 0.8   | -                      | -                 | -                 | 37.3              |
| 0.9   | -                      | -                 | -                 | 38.8              |

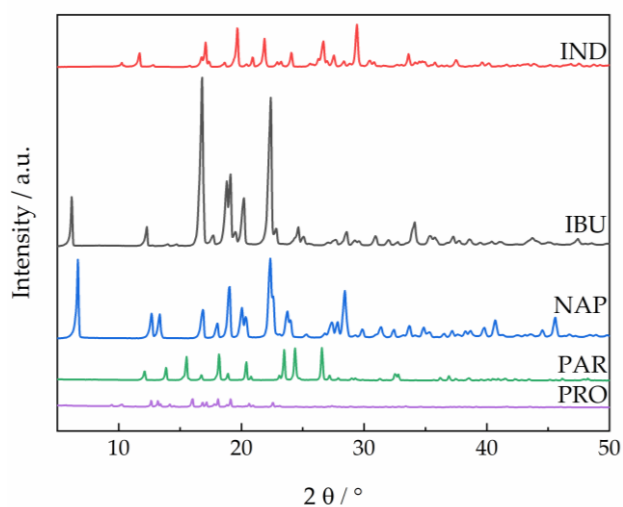

**Figure S1.** XRPD patterns of APIs studied. Based on comparison of diffractograms with the Cambridge structural database the following crystal structures were identified. IND: form  $\gamma$  (INDMET), IBU: form I (IBPRAC), NAP: form I (COYRUD11), PAR: form I (HXACAN34), and PRO: form I (HAXHET01).

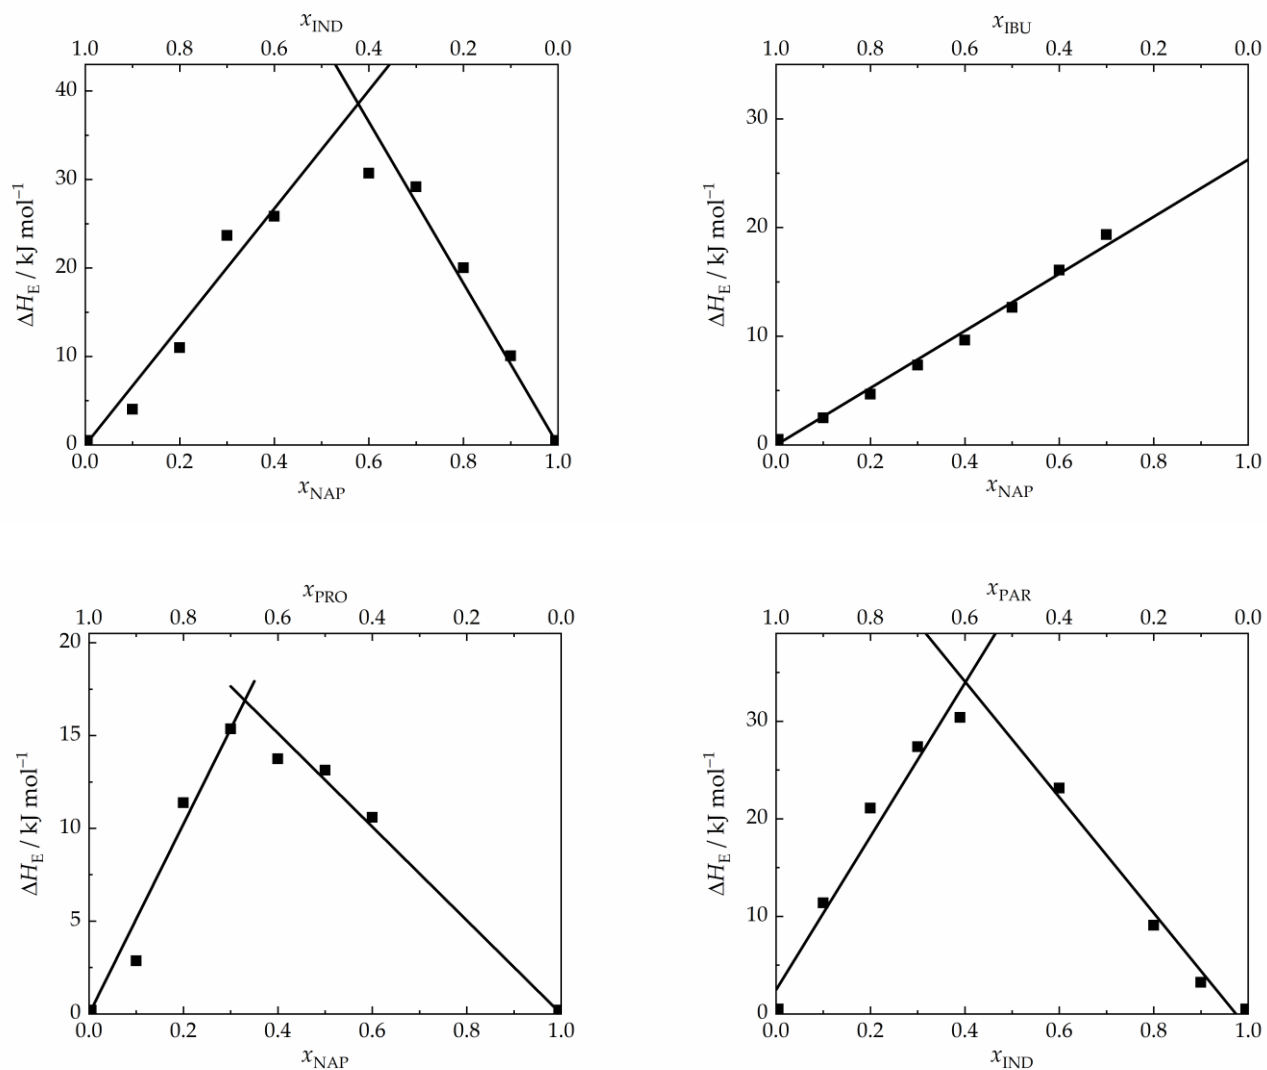

**Figure S2.** Tammann plots of studied systems.  $\Delta H_E$  represents the enthalpy obtained by integration of eutectic peak.
